# Supplementary material for: The ANC-1 (Nesprin-1/2) organelle-anchoring protein functions through mitochondria to polarize axon growth in response to SLT-1
Source: PubMed Central journal article supplement (PMC9721489; doi:10.1371/journal.pgen.1010521), 2022-11-21
Supplement: pgen.1010521.s002.pdf [file pgen.1010521.s002.pdf]

**GFP::**ANC-1B****

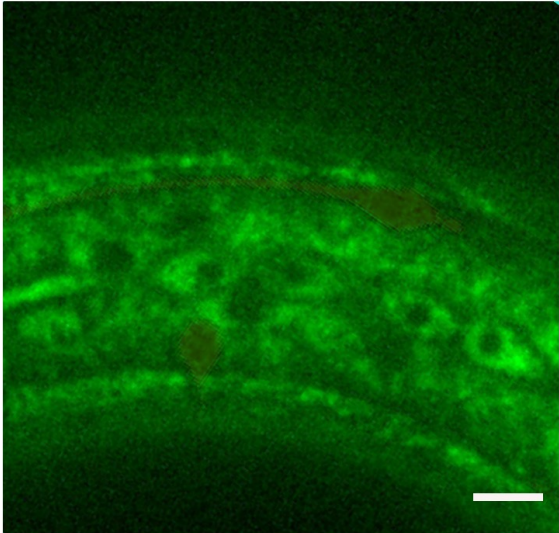

**TRN marker**

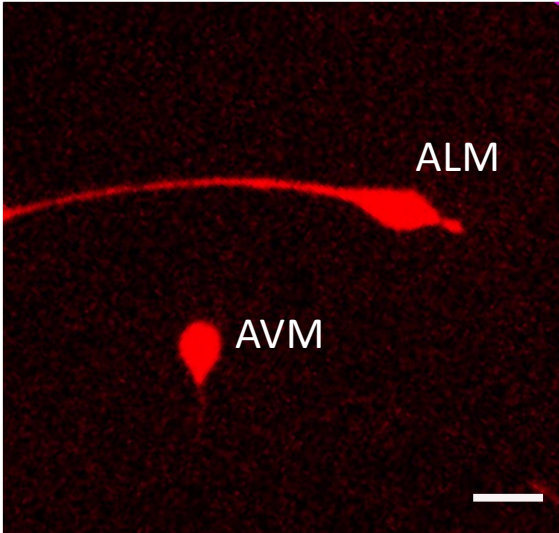

**Merge**

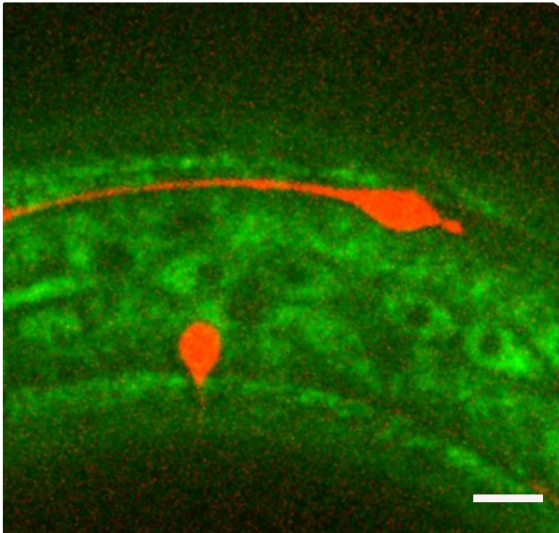

S2 Figure
